# Supplementary material
Source: PubMed Central journal article supplement (PMC7891100)
Supplement: mmc1.pdf [file mmc1.pdf]

| Sequence ID     | Start | Alignment |     |      |      |      |      | End    | Organism   |
|-----------------|-------|-----------|-----|------|------|------|------|--------|------------|
|                 |       | 1         | 5 K | 10 K | 15 K | 20 K | 25 K |        |            |
| Consensus (+)   | 1     |           |     |      |      |      |      | 29,906 |            |
| NC_045512.2 (+) | 1     |           |     |      |      |      |      | 29,903 | SARS-CoV-2 |
| A0196 (+)       | 1     |           |     |      |      |      |      | 29,897 |            |
| A0140 (+)       | 1     |           |     |      |      |      |      | 29,878 |            |
| A0082 (+)       | 1     |           |     |      |      |      |      | 29,903 |            |
| A0115 (+)       | 1     |           |     |      |      |      |      | 29,899 |            |
| A0120 (+)       | 1     |           |     |      |      |      |      | 29,900 |            |
| A0010 (+)       | 1     |           |     |      |      |      |      | 29,894 |            |
| A0080 (+)       | 1     |           |     |      |      |      |      | 29,902 |            |
| A0008 (+)       | 1     |           |     |      |      |      |      | 29,900 |            |
| A0113 (+)       | 1     |           |     |      |      |      |      | 29,866 |            |
| A0154 (+)       | 1     |           |     |      |      |      |      | 29,899 |            |
| A0044 (+)       | 1     |           |     |      |      |      |      | 29,900 |            |
| A0028 (+)       | 1     |           |     |      |      |      |      | 29,900 |            |
| A0192 (+)       | 1     |           |     |      |      |      |      | 29,899 |            |
| A0045 (+)       | 1     |           |     |      |      |      |      | 29,899 |            |
| A0034 (+)       | 1     |           |     |      |      |      |      | 29,884 |            |
| A0195 (+)       | 1     |           |     |      |      |      |      | 29,897 |            |
| A0021 (+)       | 1     |           |     |      |      |      |      | 29,897 |            |
| A0016 (+)       | 1     |           |     |      |      |      |      | 29,901 |            |
| A0193 (+)       | 1     |           |     |      |      |      |      | 29,900 |            |
| A0059 (+)       | 1     |           |     |      |      |      |      | 29,903 |            |
| A0088 (+)       | 1     |           |     |      |      |      |      | 29,900 |            |
| A0070 (+)       | 1     |           |     |      |      |      |      | 29,896 |            |
| A0103 (+)       | 1     |           |     |      |      |      |      | 29,898 |            |
| A0156 (+)       | 1     |           |     |      |      |      |      | 29,900 |            |
| A0149 (+)       | 1     |           |     |      |      |      |      | 29,899 |            |
| A0052 (+)       | 1     |           |     |      |      |      |      | 29,901 |            |
| A0048 (+)       | 1     |           |     |      |      |      |      | 29,901 |            |
| A0171 (+)       | 1     |           |     |      |      |      |      | 29,897 |            |
| A0208 (+)       | 1     |           |     |      |      |      |      | 29,872 |            |
| A0099 (+)       | 1     |           |     |      |      |      |      | 29,897 |            |
| A0201 (+)       | 1     |           |     |      |      |      |      | 29,900 |            |
| A0068 (+)       | 1     |           |     |      |      |      |      | 29,899 |            |
| A0065 (+)       | 1     |           |     |      |      |      |      | 29,886 |            |
| A0093 (+)       | 1     |           |     |      |      |      |      | 29,900 |            |
| A0187 (+)       | 1     |           |     |      |      |      |      | 29,900 |            |
| A0033 (+)       | 1     |           |     |      |      |      |      | 29,899 |            |
| A0089 (+)       | 1     |           |     |      |      |      |      | 29,903 |            |
| A0064 (+)       | 1     |           |     |      |      |      |      | 29,899 |            |
| A0203 (+)       | 1     |           |     |      |      |      |      | 29,897 |            |
| A0047 (+)       | 1     |           |     |      |      |      |      | 29,897 |            |
| A0085 (+)       | 1     |           |     |      |      |      |      | 29,900 |            |
| A0141 (+)       | 1     |           |     |      |      |      |      | 29,900 |            |
| A0189 (+)       | 1     |           |     |      |      |      |      | 29,899 |            |
| A0199 (+)       | 1     |           |     |      |      |      |      | 29,900 |            |
| A0194 (+)       | 1     |           |     |      |      |      |      | 29,901 |            |
| A0097 (+)       | 1     |           |     |      |      |      |      | 29,897 |            |
| A0017 (+)       | 1     |           |     |      |      |      |      | 29,866 |            |
| A0018 (+)       | 1     |           |     |      |      |      |      | 29,894 |            |
| A0057 (+)       | 1     |           |     |      |      |      |      | 29,900 |            |
| A0014 (+)       | 1     |           |     |      |      |      |      | 29,901 |            |
| A0078 (+)       | 1     |           |     |      |      |      |      | 29,899 |            |
| A0181 (+)       | 1     |           |     |      |      |      |      | 29,900 |            |
| A0084 (+)       | 1     |           |     |      |      |      |      | 29,901 |            |
| A0122 (+)       | 1     |           |     |      |      |      |      | 29,897 |            |
| A0118 (+)       | 1     |           |     |      |      |      |      | 29,899 |            |
| A0138 (+)       | 1     |           |     |      |      |      |      | 29,875 |            |
| A0175 (+)       | 1     |           |     |      |      |      |      | 29,900 |            |
| A0069 (+)       | 1     |           |     |      |      |      |      | 29,900 |            |
| A0090 (+)       | 1     |           |     |      |      |      |      | 29,862 |            |
| A0015 (+)       | 1     |           |     |      |      |      |      | 29,897 |            |
| A0013 (+)       | 1     |           |     |      |      |      |      | 29,897 |            |
| A0145 (+)       | 1     |           |     |      |      |      |      | 29,897 |            |
| A0020 (+)       | 1     |           |     |      |      |      |      | 29,900 |            |
| A0137 (+)       | 1     |           |     |      |      |      |      | 29,899 |            |
| A0188 (+)       | 1     |           |     |      |      |      |      | 29,903 |            |
| A0030 (+)       | 1     |           |     |      |      |      |      | 29,899 |            |
| A0123 (+)       | 1     |           |     |      |      |      |      | 29,899 |            |
| A0205 (+)       | 1     |           |     |      |      |      |      | 29,899 |            |
| A0091 (+)       | 1     |           |     |      |      |      |      | 29,903 |            |
| A0022 (+)       | 1     |           |     |      |      |      |      | 29,900 |            |
| A0180 (+)       | 1     |           |     |      |      |      |      | 29,897 |            |
| A0111 (+)       | 1     |           |     |      |      |      |      | 29,900 |            |
| A0051 (+)       | 1     |           |     |      |      |      |      | 29,897 |            |
| A0039 (+)       | 1     |           |     |      |      |      |      | 29,872 |            |
| A0098 (+)       | 1     |           |     |      |      |      |      | 29,899 |            |
| A0121 (+)       | 1     |           |     |      |      |      |      | 29,897 |            |
| A0200 (+)       | 1     |           |     |      |      |      |      | 29,900 |            |
| A0076 (+)       | 1     |           |     |      |      |      |      | 29,899 |            |
| A0007 (+)       | 1     |           |     |      |      |      |      | 29,901 |            |
| A0025 (+)       | 1     |           |     |      |      |      |      | 29,900 |            |
| A0032 (+)       | 1     |           |     |      |      |      |      | 29,899 |            |
| A0026 (+)       | 1     |           |     |      |      |      |      | 29,900 |            |
| A0019 (+)       | 1     |           |     |      |      |      |      | 29,900 |            |
| A0095 (+)       | 1     |           |     |      |      |      |      | 29,899 |            |
| A0042 (+)       | 1     |           |     |      |      |      |      | 29,902 |            |
| A0005 (+)       | 1     |           |     |      |      |      |      | 29,897 |            |
| A0147 (+)       | 1     |           |     |      |      |      |      | 29,900 |            |
| A0092 (+)       | 1     |           |     |      |      |      |      | 29,899 |            |
| A0119 (+)       | 1     |           |     |      |      |      |      | 29,897 |            |
| A0136 (+)       | 1     |           |     |      |      |      |      | 29,897 |            |
| A0056 (+)       | 1     |           |     |      |      |      |      | 29,897 |            |
| A0031 (+)       | 1     |           |     |      |      |      |      | 29,899 |            |
| A0182 (+)       | 1     |           |     |      |      |      |      | 29,897 |            |
| A0046 (+)       | 1     |           |     |      |      |      |      | 29,899 |            |
| A0071 (+)       | 1     |           |     |      |      |      |      | 29,897 |            |
| A0117 (+)       | 1     |           |     |      |      |      |      | 29,899 |            |
| A0176 (+)       | 1     |           |     |      |      |      |      | 29,899 |            |
| A0146 (+)       | 1     |           |     |      |      |      |      | 29,900 |            |
| A0183 (+)       | 1     |           |     |      |      |      |      | 29,897 |            |
| A0086 (+)       | 1     |           |     |      |      |      |      | 29,900 |            |
| A0079 (+)       | 1     |           |     |      |      |      |      | 29,901 |            |
| A0131 (+)       | 1     |           |     |      |      |      |      | 29,900 |            |
| A0161 (+)       | 1     |           |     |      |      |      |      | 29,900 |            |
| A0153 (+)       | 1     |           |     |      |      |      |      | 29,899 |            |
| A0049 (+)       | 1     |           |     |      |      |      |      | 29,899 |            |
| A0036 (+)       | 1     |           |     |      |      |      |      | 29,901 |            |
| A0172 (+)       | 1     |           |     |      |      |      |      | 29,900 |            |
| A0165 (+)       | 1     |           |     |      |      |      |      | 29,900 |            |
| A0162 (+)       | 1     |           |     |      |      |      |      | 29,900 |            |
| A0116 (+)       | 1     |           |     |      |      |      |      | 29,900 |            |
| A0190 (+)       | 1     |           |     |      |      |      |      | 29,903 |            |
| A0087 (+)       | 1     |           |     |      |      |      |      | 29,901 |            |
| A0155 (+)       | 1     |           |     |      |      |      |      | 29,900 |            |
| A0198 (+)       | 1     |           |     |      |      |      |      | 29,899 |            |
| A0041 (+)       | 1     |           |     |      |      |      |      | 29,899 |            |
| A0151 (+)       | 1     |           |     |      |      |      |      | 29,901 |            |
| A0058 (+)       | 1     |           |     |      |      |      |      | 29,884 |            |
| A0174 (+)       | 1     |           |     |      |      |      |      | 29,899 |            |
| A0173 (+)       | 1     |           |     |      |      |      |      | 29,900 |            |
| A0206 (+)       | 1     |           |     |      |      |      |      | 29,899 |            |
| A0129 (+)       | 1     |           |     |      |      |      |      | 29,900 |            |
| A0105 (+)       | 1     |           |     |      |      |      |      | 29,897 |            |
| A0054 (+)       | 1     |           |     |      |      |      |      | 29,899 |            |
| A0075 (+)       | 1     |           |     |      |      |      |      | 29,871 |            |
| A0073 (+)       | 1     |           |     |      |      |      |      | 29,897 |            |
| A0185 (+)       | 1     |           |     |      |      |      |      | 29,897 |            |
| A0114 (+)       | 1     |           |     |      |      |      |      | 29,897 |            |
| A0164 (+)       | 1     |           |     |      |      |      |      | 29,884 |            |
| A0110 (+)       | 1     |           |     |      |      |      |      | 29,896 |            |
| A0202 (+)       | 1     |           |     |      |      |      |      | 29,897 |            |
| A0024 (+)       | 1     |           |     |      |      |      |      | 29,897 |            |
| A0004 (+)       | 1     |           |     |      |      |      |      | 29,899 |            |
| A0187 (+)       | 1     |           |     |      |      |      |      | 29,891 |            |
| A0197 (+)       | 1     |           |     |      |      |      |      | 29,897 |            |
| A0152 (+)       | 1     |           |     |      |      |      |      | 29,883 |            |
| A0178 (+)       | 1     |           |     |      |      |      |      | 29,852 |            |
| A0106 (+)       | 1     |           |     |      |      |      |      | 29,889 |            |
| A0006 (+)       | 1     |           |     |      |      |      |      | 29,899 |            |
| A0167 (+)       | 1     |           |     |      |      |      |      | 29,889 |            |
| A0210 (+)       | 1     |           |     |      |      |      |      | 29,872 |            |
| A0060 (+)       | 1     |           |     |      |      |      |      | 29,899 |            |
| A0157 (+)       | 1     |           |     |      |      |      |      | 29,849 |            |
| A0163 (+)       | 1     |           |     |      |      |      |      | 29,893 |            |
| A0148 (+)       | 1     |           |     |      |      |      |      | 29,868 |            |
| A0133 (+)       | 1     |           |     |      |      |      |      | 29,806 |            |
| A0144 (+)       | 1     |           |     |      |      |      |      | 29,897 |            |
| A0160 (+)       | 1     |           |     |      |      |      |      | 29,855 |            |
| A0055 (+)       | 1     |           |     |      |      |      |      | 29,897 |            |
| A0027 (+)       | 1     |           |     |      |      |      |      | 29,862 |            |
| A0062 (+)       | 1     |           |     |      |      |      |      | 29,897 |            |
| A0094 (+)       | 1     |           |     |      |      |      |      | 29,897 |            |
| A0139 (+)       | 1     |           |     |      |      |      |      | 29,897 |            |
| A0081 (+)       | 1     |           |     |      |      |      |      | 29,854 |            |
| A0104 (+)       | 1     |           |     |      |      |      |      | 29,642 |            |
| A0108 (+)       | 1     |           |     |      |      |      |      | 29,897 |            |
| A0066 (+)       | 1     |           |     |      |      |      |      | 29,667 |            |
| A0083 (+)       | 1     |           |     |      |      |      |      | 29,843 |            |
| A0023 (+)       | 1     |           |     |      |      |      |      | 29,875 |            |
| A0143 (+)       | 1     |           |     |      |      |      |      | 29,897 |            |
| A0009 (+)       | 1     |           |     |      |      |      |      | 29,864 |            |
| A0204 (+)       | 1     |           |     |      |      |      |      | 29,802 |            |
| A0132 (+)       | 1     |           |     |      |      |      |      | 29,814 |            |
| A0040 (+)       | 1     |           |     |      |      |      |      | 29,744 |            |
| A0063 (+)       | 1     |           |     |      |      |      |      | 29,817 |            |
| A0053 (+)       | 1     |           |     |      |      |      |      | 29,745 |            |
| A0043 (+)       | 1     |           |     |      |      |      |      | 29,740 |            |
| A0124 (+)       | 1     |           |     |      |      |      |      | 29,792 |            |
| A0112 (+)       | 1     |           |     |      |      |      |      | 29,825 |            |
| A0134 (+)       | 1     |           |     |      |      |      |      | 29,688 |            |
| A0107 (+)       | 1     |           |     |      |      |      |      | 29,663 |            |
| A0207 (+)       | 1     |           |     |      |      |      |      | 29,806 |            |
| A0061 (+)       | 1     |           |     |      |      |      |      | 29,782 |            |
| A0177 (+)       | 1     |           |     |      |      |      |      | 29,771 |            |
| A0003 (+)       | 1     |           |     |      |      |      |      | 29,688 |            |
| A0101 (+)       | 1     |           |     |      |      |      |      | 29,884 |            |
| A0072 (+)       | 1     |           |     |      |      |      |      | 29,631 |            |
| A0102 (+)       | 1     |           |     |      |      |      |      | 29,781 |            |
| A0029 (+)       | 1     |           |     |      |      |      |      | 29,757 |            |
| A0067 (+)       | 1     |           |     |      |      |      |      | 29,757 |            |
| A0109 (+)       | 1     |           |     |      |      |      |      | 29,663 |            |
| A0209 (+)       | 1     |           |     |      |      |      |      | 29,694 |            |
| A0179 (+)       | 1     |           |     |      |      |      |      | 29,898 |            |
| A0035 (+)       | 1     |           |     |      |      |      |      | 29,748 |            |
| A0184 (+)       | 1     |           |     |      |      |      |      | 29,878 |            |
| A0142 (+)       | 1     |           |     |      |      |      |      | 29,472 |            |
| A0191 (+)       | 1     |           |     |      |      |      |      | 29,821 |            |

Samples with <90% coverage  
Not Included in the Analysis
