# Supplementary material
Source: PubMed Central journal article supplement (PMC7891100)

Fig. S2a

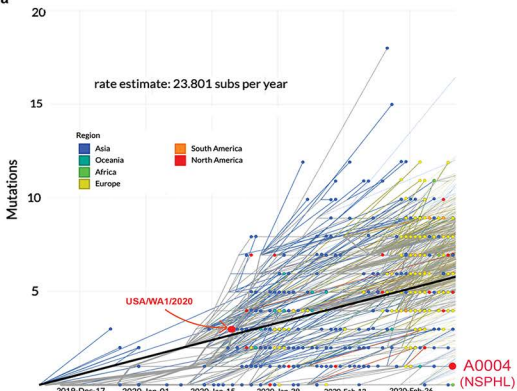

Fig. S2b

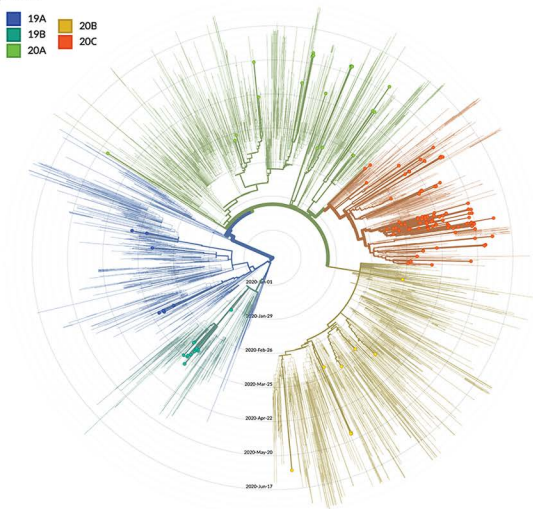

Supplement: mmc2.pdf [file mmc2.pdf]

**Fig. S3**

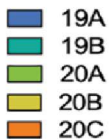

**Samples**

**Northern NV**

91 Washoe County

23 Carson-Tahoe

19 Other counties

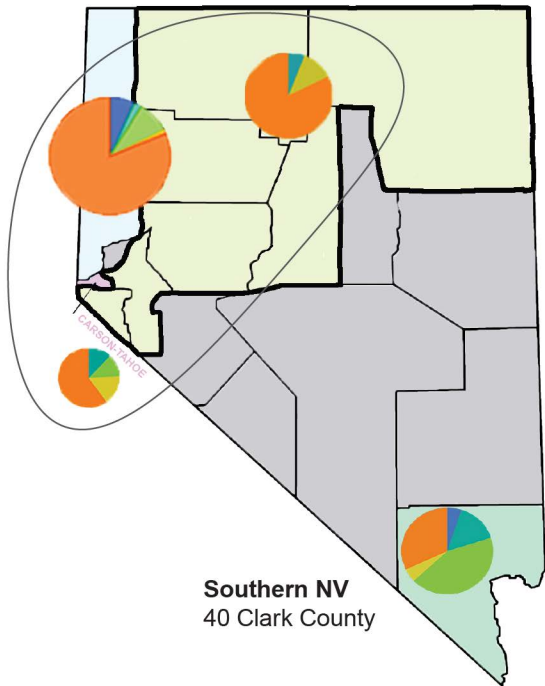

Supplement: mmc3.pdf [file mmc3.pdf]
